# Supplementary material for: Receipt of Evidence-Based Pharmacotherapy and Psychotherapy Among Children and Adolescents With New Diagnoses of Depression
Source: Atypon-hosted journal article supplement (doi:10.1176/appi.ps.201500090), 2016-01-04
Supplement: appi.ps.201500090.ds001.pdf [file appi.ps.201500090.ds001.pdf]

**Utilization rates of three types of Psychotherapy by provider specialty in youths with depression**

| <b>Provider Specialty</b> | <b>Psychotherapy individual</b> |          | <b>Psychotherapy, family</b> |          | <b>Psychotherapy, group</b> |          | <b>No Psychotherapy</b> |          |
|---------------------------|---------------------------------|----------|------------------------------|----------|-----------------------------|----------|-------------------------|----------|
|                           | <b>N</b>                        | <b>%</b> | <b>N</b>                     | <b>%</b> | <b>N</b>                    | <b>%</b> | <b>N</b>                | <b>%</b> |
| Mental Health (n=9,855)   | 4,191                           | 42.52    | 303                          | 3.07     | 19                          | 0.19     | 5,342                   | 54.20    |
| Primary Care (n=14,960)   | 868                             | 5.80     | 73                           | 0.48     | 24                          | 0.16     | 13,725                  | 91.74    |
| Total (n=24,815)          | 5,059                           | 20.38    | 376                          | 1.51     | 43                          | 0.17     | 19,067                  | 76.83    |
